# Supplementary material
Source: Springer Nature journal article supplement (https://www.springermedizin.de/resource/supplementary/12987_2012_62_MOESM1_ESM.pdf/9680258)

Cystatin  
C →

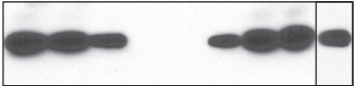

— 15 kDa

— 10 kDa

Supplement: MOESM1 [file 9680258]
